# Supplementary material for: Exposure of Lycopersicon Esculentum to Microcystin-LR: Effects in the Leaf Proteome and Toxin Translocation from Water to Leaves and Fruits
Source: MDPI journal article supplement (doi:10.3390/toxins6061837), 2014-06-11
Supplement: s1 [file s1]

Supplementary Information

**Figure S1.** LC-MS and MS/MS analysis of MC-LR in the different tissues of adult *Lycopersicon esculentum* plants, roots (a); green tomatoes (b); red tomatoes (c) and leaves (d). MC-LR reference fragment ions (#).

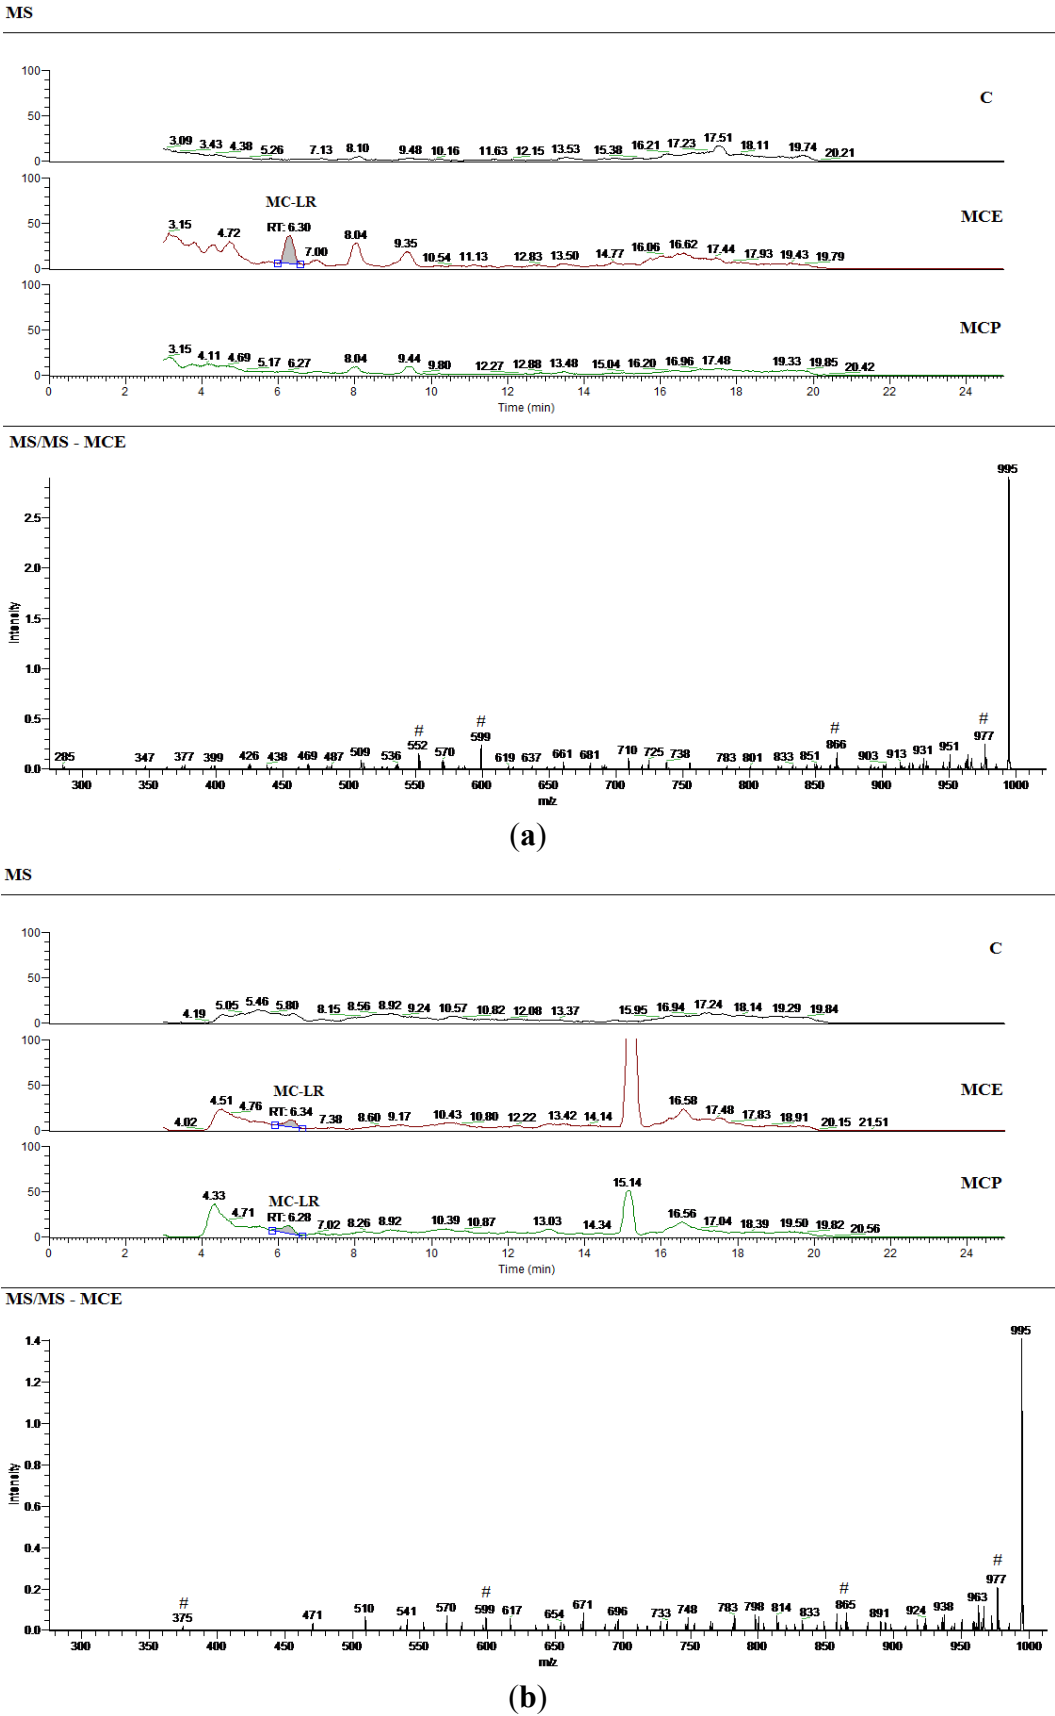

Figure S1. Cont.

MS

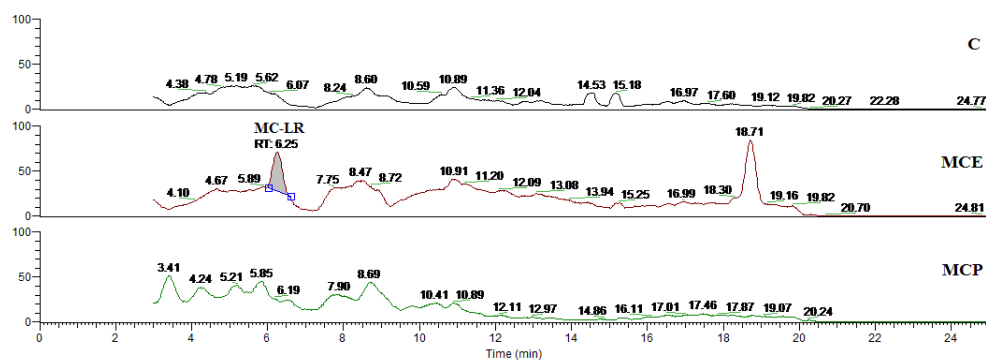

MS/MS - MCE

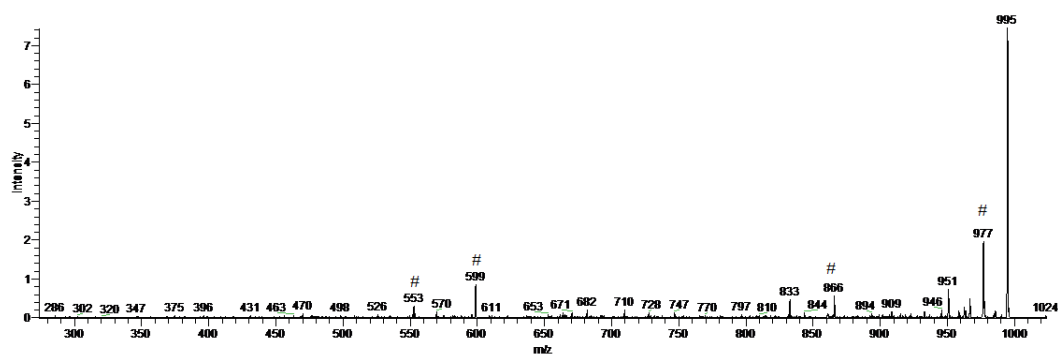

(c)

MS

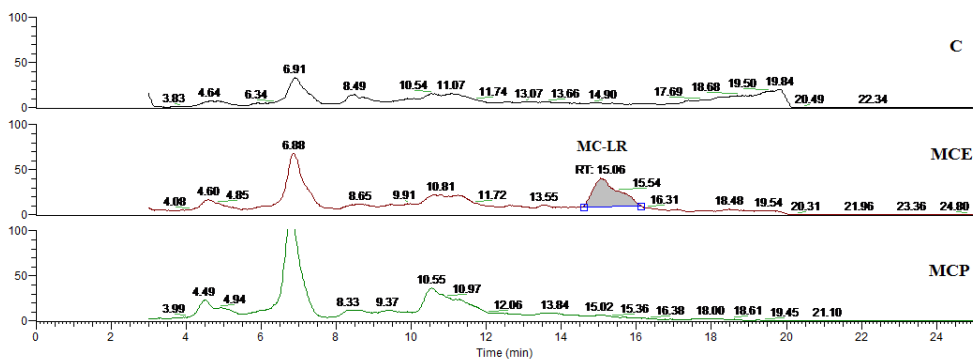

MS/MS - MCE

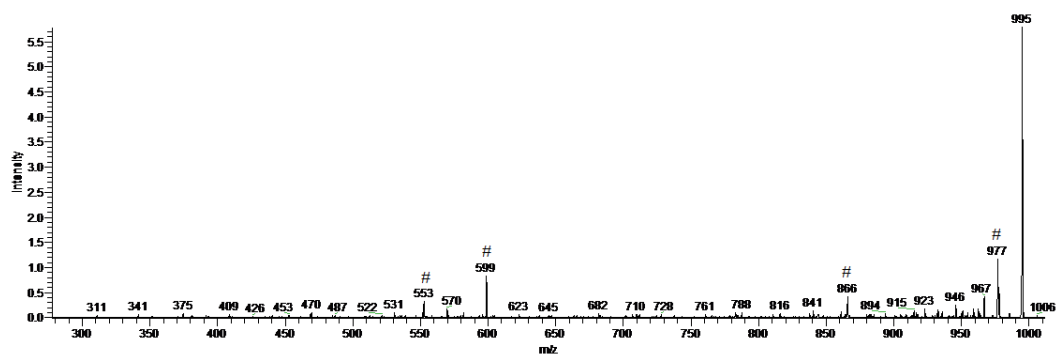

(d)
